# Supplementary material for: In Vitro Biological Impact of Nanocellulose Fibers on Human Gut Bacteria and Gastrointestinal Cells
Source: MDPI journal article supplement (doi:10.3390/nano10061159), 2020-06-12
Supplement: s1 [file s1]

# Supplementary Information

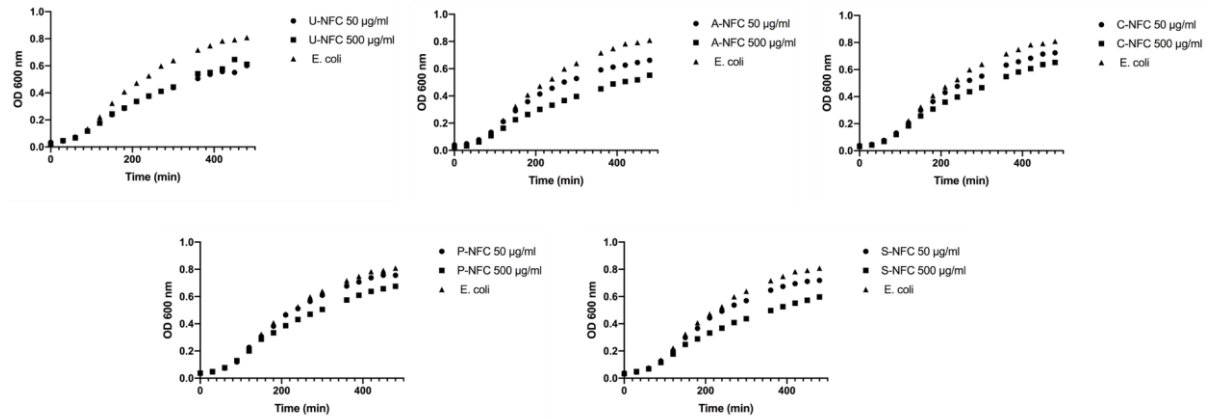

**Figure S1.** Growth curves of *E. coli* exposed to the different nanofibrillated cellulose materials and non-exposed bacteria.

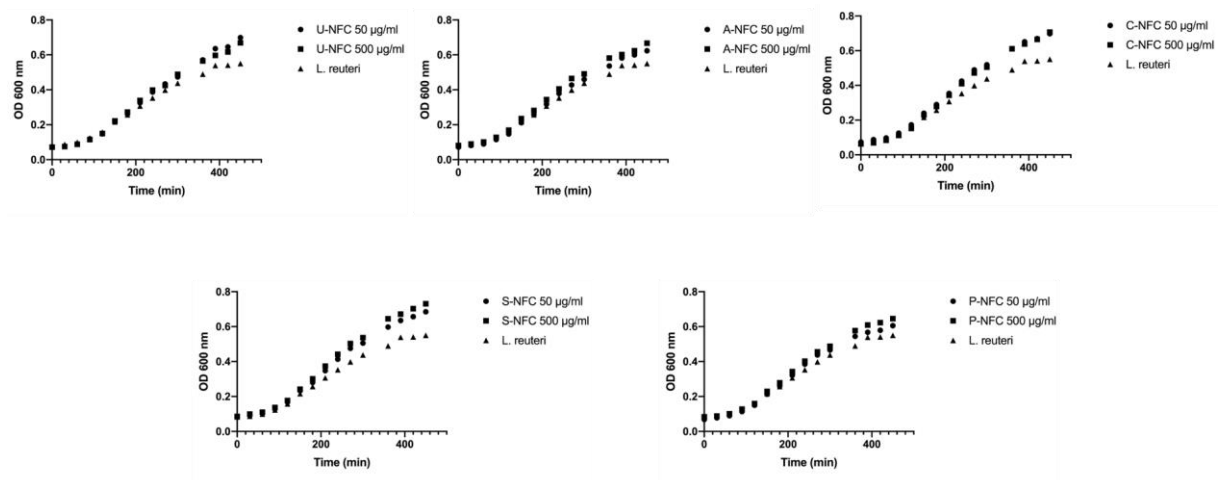

**Figure S2.** Growth curves of *L. reuteri* exposed to the different nanofibrillated cellulose materials and non-exposed bacteria.
